# Supplementary material for: Quercetin 3-O-Glucuronide from Aglianico Vine Leaves: A Selective Sustainable Recovery and Accumulation Monitoring
Source: MDPI journal article supplement (doi:10.3390/foods12142646), 2023-07-09
Supplement: s1 [file s1]

# Quercetin 3-O-glucuronide from Aglianico vine leaves: a selective sustainable recovery and accumulation monitoring

Elena Cioffi<sup>1</sup>, Lara Comune<sup>2</sup>, Simona Piccolella<sup>2,\*</sup>, Mario Buono<sup>1</sup>, and Severina Pacifico<sup>2</sup>

<sup>1</sup> Department of Engineering, University of Campania “L. Vanvitelli”, Italy

<sup>2</sup> Department of Environmental, Biological and Pharmaceutical Sciences and Technologies, Technologies, University of Campania “L. Vanvitelli”, Italy

\*Correspondence: [simona.piccolella@unicampania.it](mailto:simona.piccolella@unicampania.it)

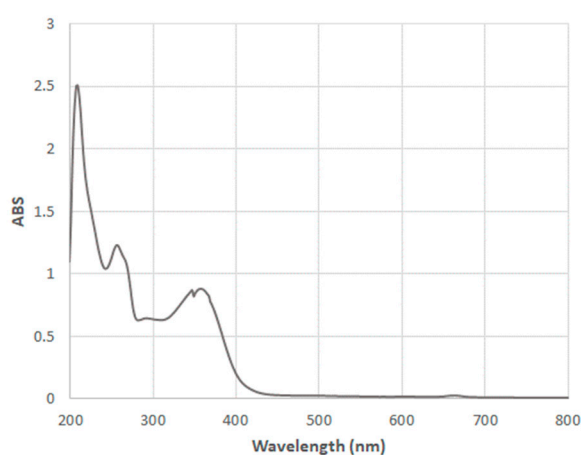

**Figure S1.** Representative UV-Vis spectrum of SPE fractions eluted with EtOAc.

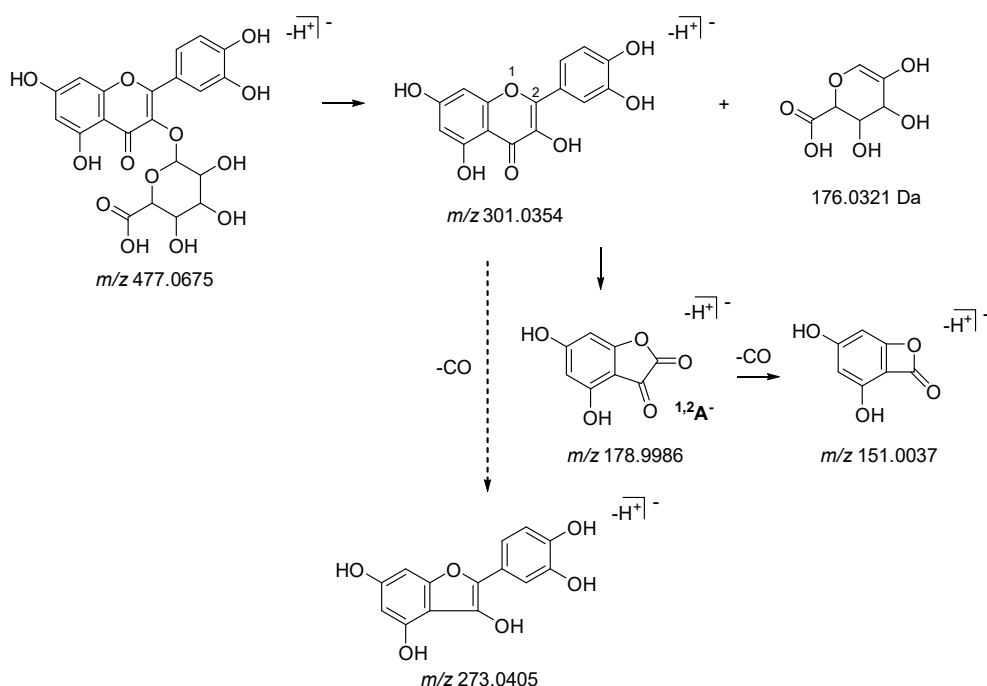

**Figure S2.** The fragmentation pathway proposed for quercetin 3-O-glucuronide (theoretical  $m/z$  values are reported below each structure).

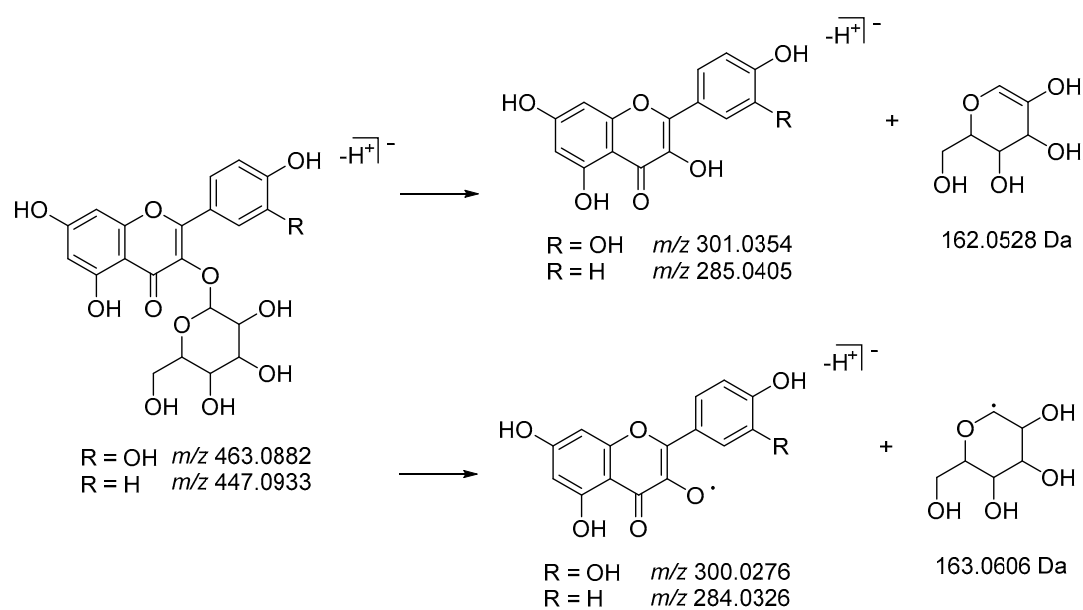

**Figure S3.** The formation of aglycone ions and the corresponding radical anions observed for hexosyl derivatives of quercetin and kaempferol.

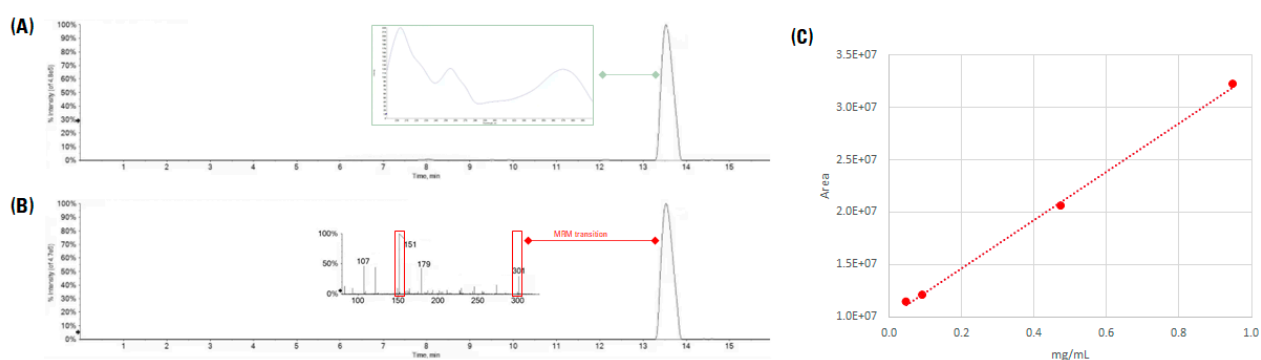

**Figure S4.** (A) HPLC-UV/DAD chromatogram and UV-DAD spectrum related to quercetin; (B) HPLC-MS chromatogram acquired in MRM mode, choosing the most favorable transition ( $m/z$  301  $\rightarrow$  151) based on the MS/MS spectrum; (C) quercetin calibration curve.
